# Supplementary material
Source: publisher figshare collection journal article supplement (https://acs.figshare.com/ndownloader/files/12798578)
Supplement: Supplementary file 1 [file 12798578]

## Supporting Information

Modulating surface morphology and thin film transistor performance of bi-thieno[3,4-c]pyrrole-4,6-dione based polymer semiconductor by altering pre-aggregation in solution

*Guangcheng Ouyang,<sup>#, ∇, †</sup> Hongzhuo Wu, <sup>#, ∇, †</sup> Xiaolan Qiao, <sup>#</sup> Jidong Zhang, <sup>§</sup>*

*Hongxiang Li<sup>#, \*</sup>*

<sup>#</sup> Key Laboratory of Synthetic and Self-Assembly Chemistry for Organic Functional Molecules, Shanghai Institute of Organic Chemistry, Chinese Academy of Sciences, Shanghai, China.

<sup>§</sup> State Key Laboratory of Polymer Chemistry and Physics, Changchun Institute of Applied Chemistry, Chinese Academy of Sciences, Changchun, China.

<sup>∇</sup> The University of Chinese Academy of Sciences, Beijing, China

lhx@sioc.ac.cn

## **Table of Contents**

Figure S1 TGA and DSC curves of **P1**

Table S1 The transistor performance of **P1** films deposited under different lifting rates

Figure S2 AFM images of **P1** film dip coated at 40 °C and 50 °C

Figure S3 SEM images of **P1** film dip coated at 60 °C, 70 °C, 80°C and 90 °C

Figure S4 Transfer and output curves of **P1** film dip coated at different solution temperatures.

Table S2 The transistor performance of **P1** films deposited by variable-temperature drop casting

Figure S5 Elemental analysis of **P1**

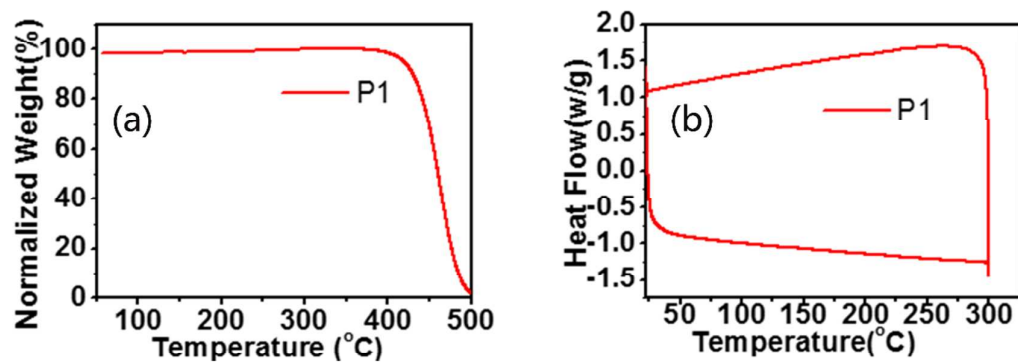

**Figure S1.** (a) TGA and (b) DSC curves of **P1**

**Table S1** Transistor performances of **P1** films dip-coated at different lifting rates

| Lifting rate<br>mm / min | $\mu_{\text{max(av)}}^{\text{a}}$<br>$\text{cm}^2 / (\text{V}\cdot\text{s})$ | $V_{\text{th}}$<br>V | $I_{\text{on}}/I_{\text{off}}$ |
|--------------------------|------------------------------------------------------------------------------|----------------------|--------------------------------|
| 1                        | 0.19 (0.12)                                                                  | -10~-15              | $10^{5\sim6}$                  |
| 5                        | 0.28 (0.19)                                                                  | -10~-20              | $10^{5\sim6}$                  |
| 10                       | 0.43 (0.29)                                                                  | -5~-20               | $10^{5\sim6}$                  |
| 25                       | 0.54 (0.35)                                                                  | -10~-20              | $10^{5\sim6}$                  |
| 50                       | 0.41 (0.26)                                                                  | -3~-15               | $10^{5\sim6}$                  |
| 100                      | 0.18 (0.16)                                                                  | -10~-20              | $10^{5\sim6}$                  |

<sup>a</sup> The solution concentration and temperature are not optimized

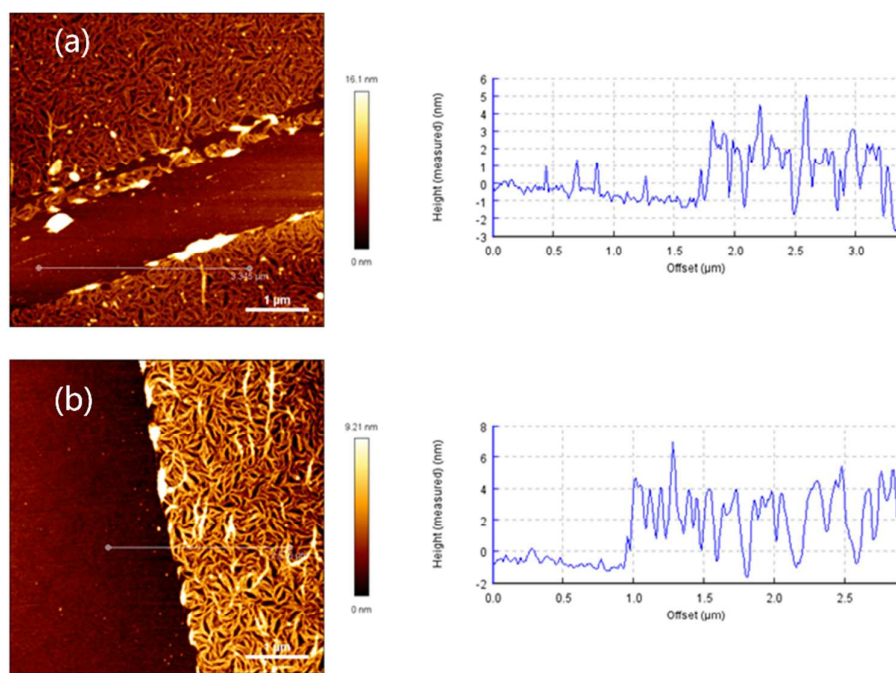

**Figure S2.** AFM images of P1 dip-coated at temperature of (a) 40 °C and (b) 50 °C

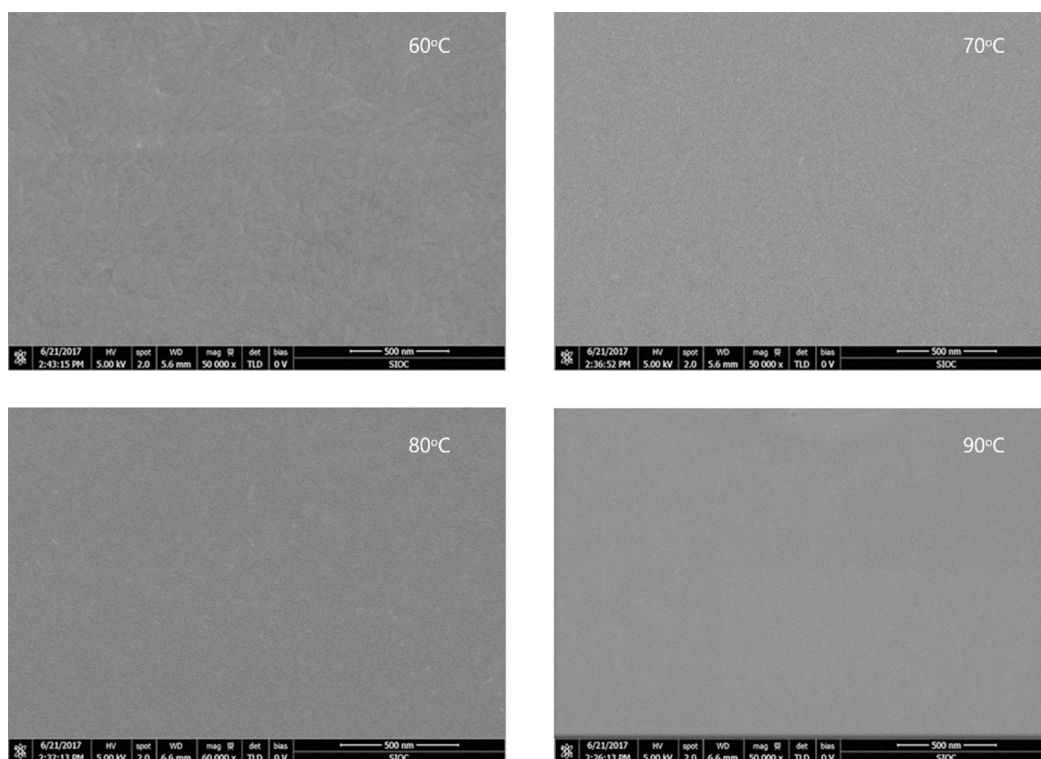

**Figure S3.** SEM images of P1 dip-coated at temperature of 60 °C, 70 °C, 80°C and 90 °C

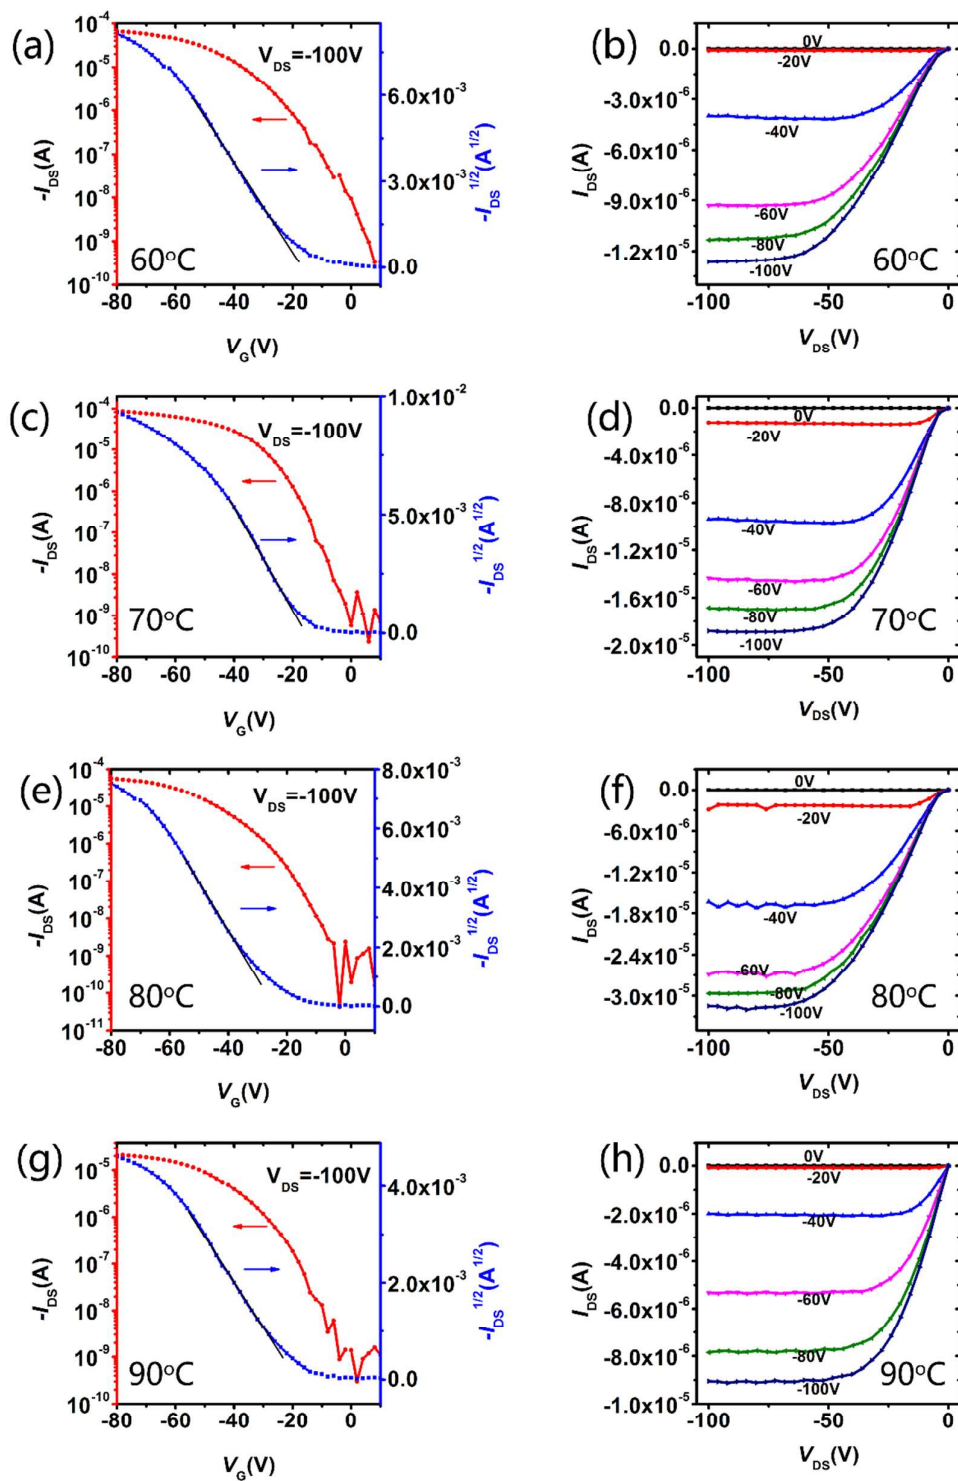

**Figure S4.** Transfer curves (a, c, e, g) and output curves (b, d, f, h) of P1 films dip-coated at different solution temperatures.

**Table S2.** Transistor performance of **P1** film fabricated by drop-casting (solution: 0.05 mg / mL TCE)

| Solution temperature<br>°C | $\mu_{\text{max}}/\mu_{\text{ave}}$<br>$\text{cm}^2 / (\text{V}\cdot\text{s})$ | $V_{\text{th}}$<br>V | $I_{\text{on}}/I_{\text{off}}$ |
|----------------------------|--------------------------------------------------------------------------------|----------------------|--------------------------------|
| 20                         | $0.027 (1.78 \pm 0.57) \times 10^{-2}$                                         | $21.87 \pm 2.46$     | $10^{5-6}$                     |
| 50                         | $0.085 (4.16 \pm 2.45) \times 10^{-2}$                                         | $18.97 \pm 3.71$     | $10^{5-6}$                     |
| 60                         | $0.199 (5.19 \pm 4.78) \times 10^{-2}$                                         | $19.31 \pm 5.82$     | $10^{5-6}$                     |
| 70                         | $0.131$<br>$(1.07 \pm 0.25) \times 10^{-1}$                                    | $35.33 \pm 5.63$     | $10^{5-6}$                     |
| 80                         | $0.185 (1.64 \pm 0.22) \times 10^{-1}$                                         | $24.33 \pm 5.82$     | $10^{5-6}$                     |
| 90                         | $0.148 (7.02 \pm 4.16) \times 10^{-2}$                                         | $31.73 \pm 5.35$     | $10^{5-6}$                     |



(3)可能的分子式或结构式:  $C_{100}H_{154}F_{24}N_4O_4S_8$

(4)大约百分含量: C 71.55 H 9.25 N 1.67

中国科学院上海有机化学研究所分析测试中心

### 元素分析报告

送样单位: 高分子材料化学

样品名称: WH2-7-59

送样者: 吴洪年

登记编号: 2393

### 分析结果

| 样品重量 |   | 1.785 | mg | 2.708 | mg | mg |
|------|---|-------|----|-------|----|----|
| 百分含量 | N | 12.3  | %  | 1.35  | %  | %  |
|      | C | 70.93 | %  | 71.08 | %  | %  |
|      | H | 9.40  | %  | 9.33  | %  | %  |

分析日期: 2017 年 4 月 14 日

Figure S5. Elemental analysis data of P1
